# Supplementary material for: Removal of Cu2+ from AMD by goethite modified biochar combined with sodium alginate: characterization, performance and mechanisms
Source: Royal Society of Chemistry journal article supplement (doi:10.1039/d4ew00664j), 2024-01-01
Supplement: d4ew00664j1.pdf [file d4ew00664j1.pdf]

## Supplementary materials

**Title: Removal of Cu<sup>2+</sup> from AMD by goethite modified biochar  
combined with sodium alginate: characterization, performance and  
mechanisms**

Hong Yang<sup>1,2</sup>, Ruixue Zhang<sup>1,2,\*</sup>, Li An<sup>1,2</sup>, Pan Wu<sup>1,2</sup>, Yuran Fu<sup>1,2</sup>, Jiajun  
Zou<sup>1,2</sup>, Min Yu<sup>1,2</sup>

<sup>1</sup>College of Resources and Environmental Engineering, Key Laboratory of Karst  
Georesources and Environment (Guizhou University), Ministry of Education,  
Guiyang 550025, China;

<sup>2</sup>Guizhou Karst Environmental Ecosystems Observation and Research Station,  
Ministry of Education, Guiyang 550025, China.12

\*Corresponding author: [zhangxuer7908@126.com](mailto:zhangxuer7908@126.com)

3 Pages, 1 Table, and 4 Figures

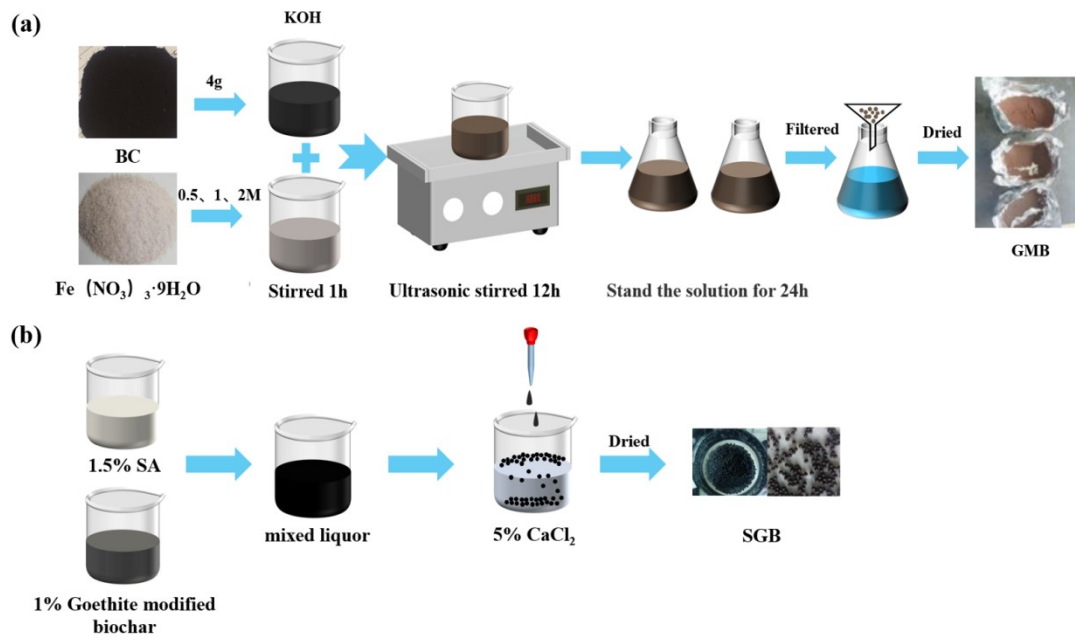

**Fig. S1.** Material preparation of GMB (a) and SGB (b)

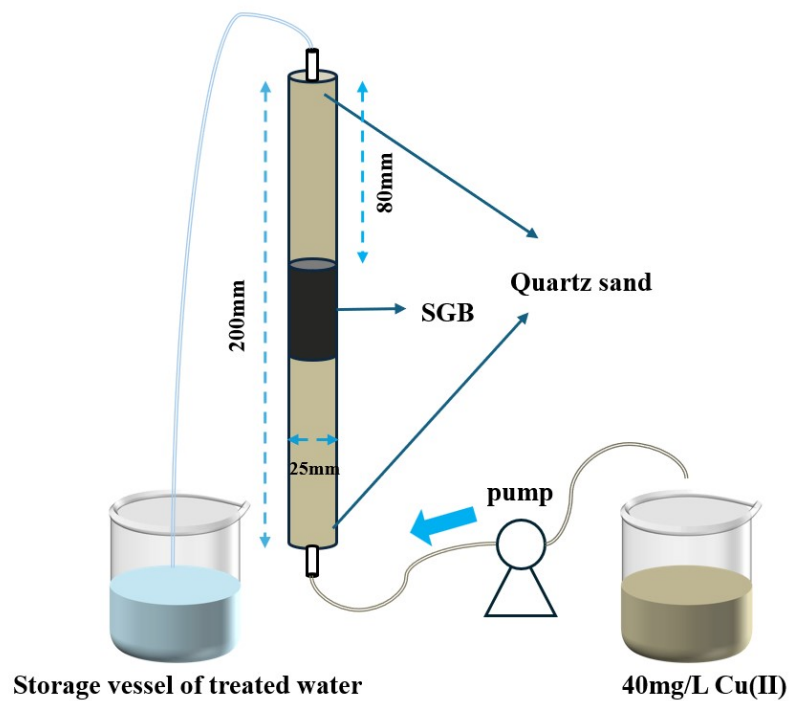

**Fig. S2.** Continuous flow column experimental setup diagram

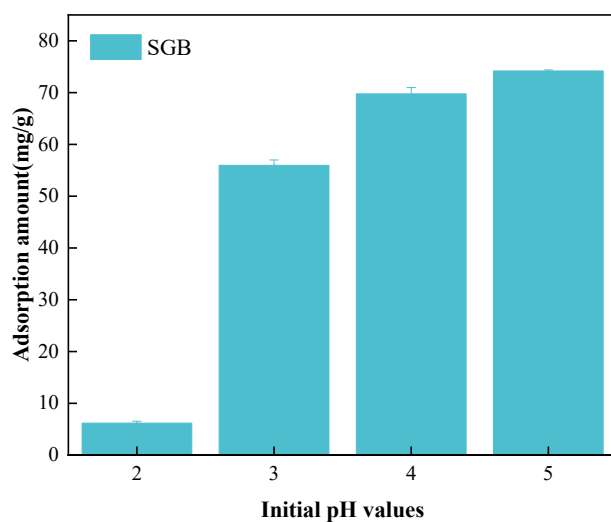

**Fig. S3.** Effect of different initial pH on the Cu<sup>2+</sup> adsorption properties of SGB

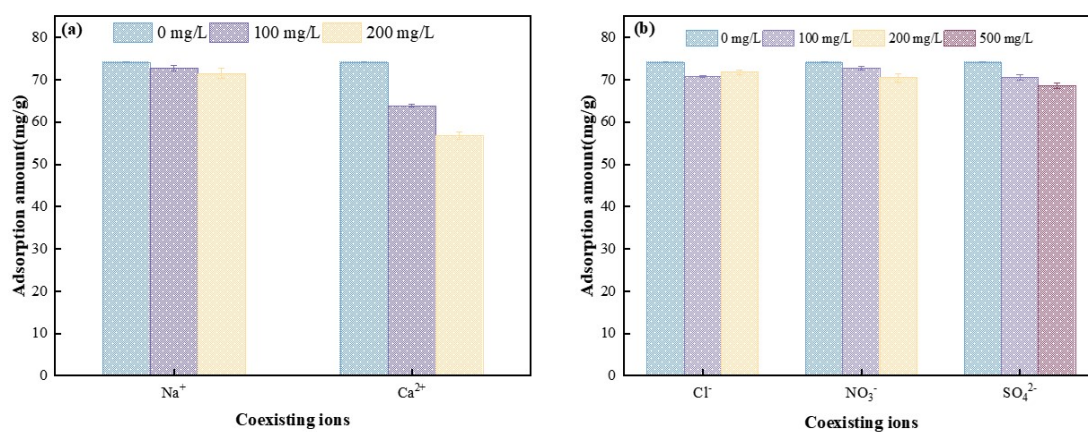

**Fig. S4.** Effects of coexisting ions (a) Na<sup>+</sup>, Ca<sup>2+</sup> and (b) Cl<sup>-</sup>, NO<sub>3</sub><sup>-</sup> and SO<sub>4</sub><sup>2-</sup> on SGB for Cu<sup>2+</sup> removal.

**Table.S1.** Parameters fitted to the Thomas mode.

| Materials | C <sub>0</sub><br>(mg/L) | Flow rates<br>(mL/min) | Dosage<br>(g) | K                     | q (mg/g) | R <sup>2</sup> |
|-----------|--------------------------|------------------------|---------------|-----------------------|----------|----------------|
| SGB       | 40.32                    | 3.0                    | 2.0           | 9.82×10 <sup>-6</sup> | 117.68   | 0.92           |
